# Supplementary material
Source: PubMed Central journal article supplement (PMC3446696)
Supplement: mmc1.pdf [file mmc1.pdf]

# Supporting Material:

## Robust Driving Forces for Transmembrane Helix Packing

Ayelet Benjamini  
Department of Chemistry,  
University of California in Berkeley, Berkeley, CA, USA

Berend Smit  
Department of Chemistry,  
University of California in Berkeley, Berkeley, CA, USA  
Department of Chemical and Biomolecular Engineering,  
University of California in Berkeley, Berkeley, CA, USA  
Materials Sciences Division,  
Lawrence Berkeley National Laboratory, Berkeley, CA, USA

### Database analysis

The extraction of experimental helix structure data from the OPM database included a few steps:

- We refine the database to include only proteins with TM helices. This includes *alpha-helical polytopic* and *alpha-helical bitopic* OPM classes as of September 2011 (357 TM proteins, 261 unique). The full list of MPs is available in Table S2.
- We extract the structure of each such protein from the database.
- We extract other supporting information on the protein such as the hydrophobic thickness of the membrane surrounding it ( $d_L$ ) and the list of the protein's transmembrane segments.
- For each TM segment of the protein we analyze the secondary structure of its residues using DSSP (1) to determine whether it has a range of residues with helical geometry.
- For each TM helix we determine the range of residues that span its hydrophobic core. The original TM segment is therefore extended if it includes more hydrophobic-scored helical residues at either end or shortened if it includes hydrophilic-scored helical residues at either end. Details on the hydrophobicity scoring function is available in the main text.

By the aforementioned process we obtained a list of hydrophobic helix cores for each membrane protein. We further analyze each hydrophobic helix core with the following steps:

- We refine the set of TM core helices to include only helices with more than 9 residues, as was done by Walters *et al.* (2).
- We analyze the structure of each helix core to define its major axis using the HELANAL (3) algorithm available through the MDAnalysis (4) package.
- We obtain the length of the hydrophilic part of the helix,  $d_H$ , by projecting the  $C_\alpha$  positions (origins) onto the obtained helix axis vector.

- We define the hydrophobic mismatch of each helix by subtracting the thickness of the membrane ( $\Delta d = d_H - d_L$ ) for each helix.
- We refine the set to analyze helices that are in the bulk range (96%) of hydrophobic mismatch ( $-10 \text{ \AA} \leq \Delta d \leq 35 \text{ \AA}$ ) and have a reasonable length per residue (in range  $[1.25, 1.8] \text{ \AA/residue}$ ; theoretical length per residue is  $1.5 \text{ \AA/residue}$ ).
- We eliminate kinked helices by screening helices that are not centered around the bilayer center. Helices whose center-of-mass distance from the bilayer center ( $z = 0$ ) in the bilayer normal direction ( $z$ ) exceeded 20% of the helix length were defined as part of a kinked helix and were not used in further analysis.
- We define each helix as *unique* / *non-unique* based on its similarity in sequence and TM segment range to other helices in the same MP. Therefore if a protein was in fact a dimer of two smaller subunits, only helices of the first monomer were defined as *unique* while the other helices were tagged as *non-unique*.

Contacts between same-protein helices were calculated following the analysis in Gimpelev *et al.* (5). Two helices were defined to be a neighboring pair if they contained at least three residues in contact. Residues were defined to be in contact if the distance between any two of their atoms was within  $0.6 \text{ \AA}$  of the sum of their van der Waals radii (6), as calculated by Li & Nussinov (7). Helix pairs were restricted to pairs in which at least one of the helices is *unique*, thereby eliminating over-counting of helix pairs. The number of contacts each helix has with other same-protein helices was also used as a measure of how influenced the helix is by other surrounding helices. Helices with less than one contact per helix residue (average  $0.57 \text{ contacts / residue}$ ) were defined as peripheral helices with minimal helix-helix interactions.

### Cross angle distribution comparison

We note that the choice of neighboring helix groups in Fig. 5 of the main text was made by balancing two factors: In order to display a representative cross angle distribution, a large enough number of data points (neighboring pairs) should be accounted for, implying the use of a large range of hydrophobic mismatch. The maximum density of helix pairs is  $33 \text{ pairs} / \Delta d^2$  (see Fig. S3) and so a range of several  $\text{\AA}$  in hydrophobic mismatch is needed to include enough data points in the distribution of pair cross angles. On the other hand, using a too-large hydrophobic mismatch range would include large variability in the tilt angle distribution of the helices (observed change of up to  $1.3^\circ / \Delta d$  in average tilt angle) and therefore a variability in the resulting cross angle distribution. We therefore chose windows of an intermediate size of  $3 \text{ \AA}$  in mismatch ranges that include a large enough number of data points. We focus on neighboring helix pairs where both helices have a positive mismatch for reasons described in the main text. Figure S3 shows the scatter-plot of neighboring helix pairs and the chosen ranges are shown for comparison.

### Reference cross angle distribution

We sampled the reference distribution of cross angle by a Monte Carlo procedure for all neighboring helix pairs in the OPM database. For each pair, we extract the hydrophobic mismatches of both helices,  $(\Delta d_1; \Delta d_2)$ . This imposes the expected tilt angle distribution of each helix, based on the information displayed in Fig. 2(a) of the main text,  $(\langle \theta_1 \rangle, \sigma_{\theta_1}; \langle \theta_2 \rangle, \sigma_{\theta_2})$ . Note that we do not explicitly use the helices tilt angle but rather the average distribution based on their mismatch, therefore obtaining the reference distribution in the case that hydrophobic mismatch would be the only factor determining the helix tilt. We then produce a set of  $N = 1000$  values of tilt angles for each helix in the pair, drawn from the imposed distribution,  $\theta_1^i \sim \mathcal{N}(\langle \theta_1 \rangle, \sigma_{\theta_1})$  and  $\theta_2^i \sim \mathcal{N}(\langle \theta_2 \rangle, \sigma_{\theta_2})$ , for  $i = 1 \dots N$ . For each  $i$ , a set of  $j = 1 \dots M = 1000$  uniformly distributed projection  $\gamma_j^i$  angles are drawn at random, and  $M$  cross angle values,  $\Omega_j^i$ , are then calculated based on Equation 1 in the main text by plugging in  $\theta_1^i, \theta_2^i, \gamma_j^i$ . We therefore obtain  $M \times N = 10^6$

independent cross angle values which we bin into a histogram of narrow  $0.1^\circ$  bins. This histogram represents the reference discrete distribution for this specific helix pair.

To obtain the overall expected cross angle histogram of all helix pairs we combine the reference histograms by adding the counts of each bin for every helix pair and normalizing the resulting distribution at the end of the procedure. As the reference distribution does not differentiate between negative and positive cross angles we calculate the cross angle value in its positive form, and set its sign randomly such that the percentage of parallel pairs will be identical to its value in the data (58.5%).

We further use the reference histograms to calculate the overall p-value of the experimental results. For each helix pair ( $k = 1 \dots 2328$ ) we calculate the probability of the pair's cross angle,  $\text{Pr}^k(\Omega_k)$ , according to the pair's corresponding reference histogram. We then sum over the probabilities of all the other bins in that reference histogram with lower probability to obtain the  $k$ 'th p-value,  $p^k = \sum_x \text{Pr}^k(x) \mid \text{Pr}^k(x) \leq \text{Pr}^k(\Omega_k)$ . To verify that the discrete binning does not bias the p-value and to get an estimate on the variance of this result, we calculate the same score on  $R = 500$  random numbers sampled directly from the histogram  $p^{k,l}$  for  $l = 1 \dots R$ . We then obtain an experimental overall p-value  $p = \sum_{k=1}^{2328} p^k = 0.497$  and  $R$  random p-values  $p^l = \sum_{k=1}^{2328} p^{k,l}$ . The average random p-value is calculated by averaging these  $R$  values. As expected, it comes out to be 0.500. The standard deviation is also obtain from these  $R$  values as 0.006.

## CG Model and Simulation Parameters

Our model consists of 3 types of beads: 1. a water like bead,  $\textcircled{w}$ , used to describe a set of three water molecules; 2. a hydrophilic bead,  $\textcircled{h}$ , used to model the lipid head group as well as the marginal part of the helix; 3. a hydrophobic tail bead,  $\textcircled{t}$ , used to model the hydrophobic lipid tail; and 4. a hydrophobic protein bead,  $\textcircled{p}$ , used to model the hydrophobic core of a TM helix. The lipid model includes a head group consisting of three  $\textcircled{h}$  type beads and two tails each containing five  $\textcircled{t}$  type beads. See Figure 1 in main text.

Our transmembrane helix model contains three structural features: 1.  $N_p$  principal beads, P, that follow the outer radius structure of an  $\alpha$ -helix backbone. All structural bonds are associated with those beads. 2.  $N_s = N_p - 1$  secondary beads, S, located in between every adjacent pair of principal beads and provide excluded volume along the helix exterior. 3.  $N_c = \text{floor}(N_p/3)$  central beads, C, located along the central axis of the helix and provide excluded volume at the helix interior.

The principal beads of our TM helix model are set along a helix of radius  $R_h = 6 \text{ \AA}$ , with angle and height pitch of  $\Delta\theta = 100^\circ$ ;  $\Delta Z = 1.5 \text{ \AA}$  between consecutive principal beads. To generate the positions of  $N_p$  principal helix beads we chose an initial angle  $\theta_0$  at random. We then place the first bead of the helix at position  $\vec{r}_0 = (R_h \times \cos(\theta_0), R_h \times \sin(\theta_0), 0)$ . For each bead thereafter,  $P_{i=1 \dots N_p-1}$ , its position is sequentially determined by  $\vec{r}_i = (R_h \times \cos(\theta_0 + \Delta\theta \cdot i), R_h \times \sin(\theta_0 + \Delta\theta \cdot i), \Delta Z \cdot i)$ .

We next position the secondary beads in between each pair of adjacent principal beads such that for each bead  $S_{j=0 \dots N_s-1}$ ;  $\vec{r}_j = (R_h \times \cos(\theta_0 + \Delta\theta \cdot (j + \frac{1}{2})), R_h \times \sin(\theta_0 + \Delta\theta \cdot (j + \frac{1}{2})), \Delta Z \cdot (j + \frac{1}{2}))$ . Lastly, the central beads are positioned along the major axis of the helix. A central bead's  $z$ -component is determined by the average position of the three principal beads it is adjacent to. This will yield for each central bead  $C_{k=0 \dots N_c-1}$ ;  $\vec{r}_k = (0, 0, \Delta Z \cdot (3k + 1))$ .

Helix bead types are assigned such that the core of the helix consists of hydrophobic  $\textcircled{p}$  type beads. Both edges of the helix, consisting of: three principal beads, two secondary beads and one central bead are assigned  $\textcircled{h}$  type. This assignment ensures that both edges of the protein remain in the water phase thus preventing unphysical configurations such as a helix lying within the membrane perpendicular to the membrane normal.

The model helix is placed within a pre-equilibrated membrane such that the  $z$ -direction of the helix corresponds to the bilayer normal.

Harmonic bond forces are used to control the inter-bead distance. These are applied between: (a) each principal bead  $P_i$  and its two adjacent secondary beads  $S_{j=i-1,i}$  (b) each two adjacent central beads  $C_k$  and  $C_{k+1}$  (c) each central bead  $C_k$  and its three adjacent principal beads  $P_{i=3k,3k+1,3k+2}$ , and (d) between each principal bead  $P_i$  and its consecutive  $P_{i+4}$  thus mimicking  $\alpha$ -helix hydrogen bonding.

Harmonic angle forces control the stiffness of the helical structure. These are applied between: (a) each three consecutive principal beads:  $(P_i, P_{i+1}, P_{i+2})$  (b) each three principal beads surrounding a hydrogen bond:  $(P_i, P_{i+4}, P_{i+5})$ , and (c) each three consecutive central beads:  $(C_k, C_{k+1}, C_{k+2})$ .

Dihedral angle forces regulate distortions in helix structure and prevent the helix from unfolding. Those dihedral forces are applied between all sets of consecutive principal beads:  $(P_i, P_{i+1}, P_{i+2}, P_{i+3})$ . Helix structure features are controlled almost exclusively by interactions of principal beads. secondary and central beads are positioned to serve as exclusive volume and are only weakly bonded to ensure they stay in close proximity to the helical structure. Interaction parameters are available in Table S1.

We simulate the system in the  $NP_{\perp}\gamma T$  ensemble using a hybrid MC-DPD technique identical to what is described by de Meyer *et al.* (8).  $N = 2014/2002$  lipids for single/pair helices respectively; reduced temperature  $T^* = 0.7$  in which the lipid bilayer is well within the  $L_\alpha$  phase;  $\gamma = 0 \text{ dyn/cm}$ ; Normal pressure is equal to the water bulk pressure,  $P^* = 22.3$  in reduced units.

**Table S1 - CG Bonding Parameters**

| Interaction    | Interacting Beads / Formula                      | Force constant           | Equilibrium value       |
|----------------|--------------------------------------------------|--------------------------|-------------------------|
| $U_{bond}$     | $\frac{1}{2}K_b(r - r_{eq})^2$                   | $K_b (\epsilon_0/d_0^2)$ | $r_{eq} (d_0)$          |
|                | $P_i \quad S_{i-1}$                              | 100                      | 0.7936                  |
|                | $P_i \quad S_i$                                  | 100                      | 0.7936                  |
|                | $P_i \quad P_{i+4}$                              | 100                      | 1.1241                  |
|                | $C_k \quad C_{k+1}$                              | 100                      | 0.6960                  |
|                | $C_k \quad P_{3k}$                               | 20                       | 0.9575                  |
|                | $C_k \quad P_{3k+1}$                             | 20                       | 0.9290                  |
|                | $C_k \quad P_{3k+2}$                             | 20                       | 0.9575                  |
| $U_{angle}$    | $\frac{1}{2}K_a(\varphi - \varphi_{eq})^2$       | $K_a (\epsilon_0)$       | $\varphi_{eq} (^\circ)$ |
|                | $P_i \quad P_{i+1} \quad P_{i+2}$                | 600                      | 81.2                    |
|                | $P_i \quad P_{i+4} \quad P_{i+5}$                | 100                      | 108.9                   |
|                | $C_k \quad C_{k+1} \quad C_{k+2}$                | 20                       | 180.0                   |
| $U_{dihedral}$ | $\frac{1}{2}K_d[\cos(\chi) - \cos(\chi_{eq})]^2$ | $K_d (\epsilon_0)$       | $\chi_{eq} (^\circ)$    |
|                | $P_i \quad P_{i+1} \quad P_{i+2} \quad P_{i+3}$  | 1000                     | 21.7                    |

Table 1: Bonded interaction parameters for the CG helix model. Reduced units correspond to  $\epsilon_0 = 1 \text{ k}_B\text{T}$ ,  $d_0 = 6.46 \text{ \AA}$ .

**Figure S1**

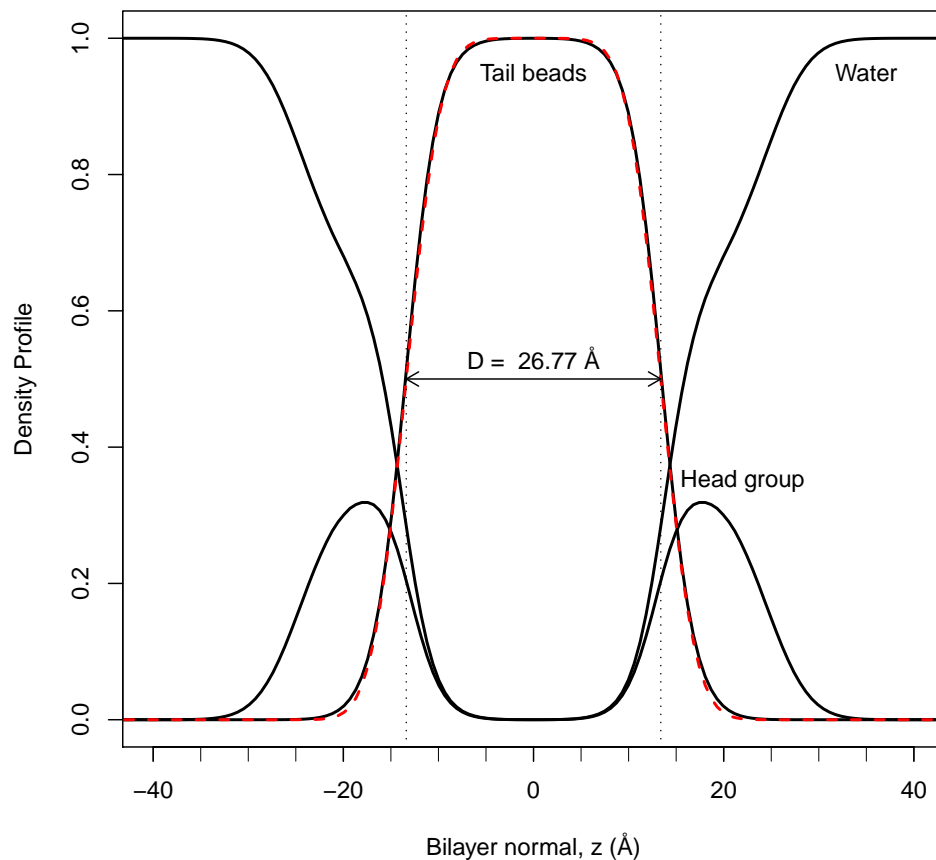

Figure 1: Density profile of a pure bilayer simulation. Solid lines show the volume fraction of the various components in the simulation: lipid head beads (head group), lipid tail beads and water. Red dashed line corresponds to the symmetric error function:  $P_{HC}(z) = \frac{1}{2} [erf(z, -z_{HC}, \sigma_{HC}) - erf(z, z_{HC}, \sigma_{HC})]$  as defined by Eq. 3 in Kucerka *et al.* (9). Fit values correspond to  $z_{HC} = 13.385 \text{ Å}$  and  $\sigma_{HC} = 2.85 \text{ Å}$  yielding a hydrophobic thickness of  $d_L = 26.77 \text{ Å}$ .

**Figure S2**

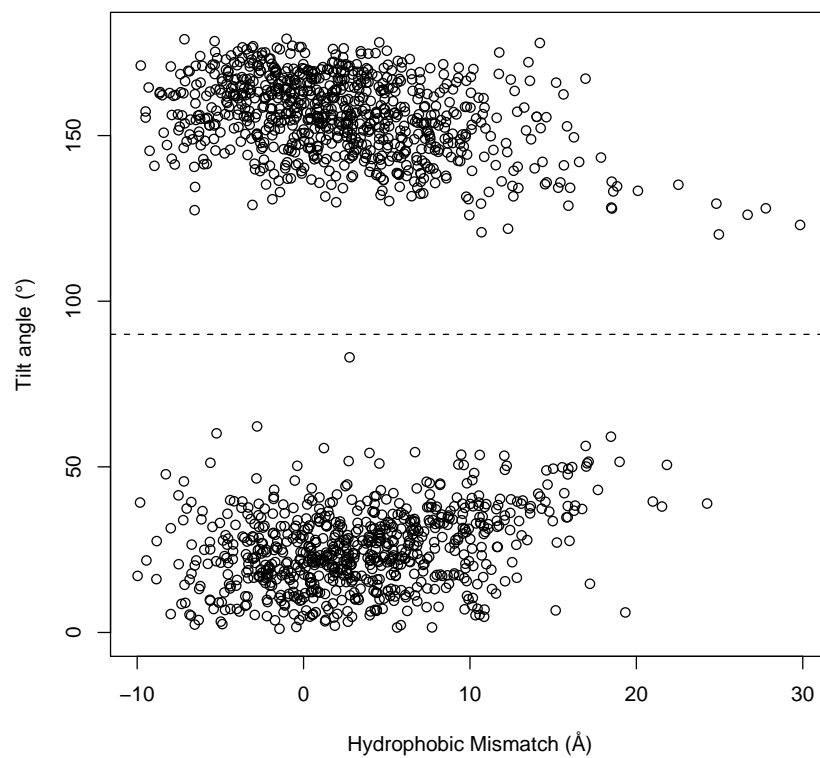

Figure 2: Unadjusted tilt angles versus hydrophobic mismatch scatter plot shows a mirror effect around  $\theta = 90^\circ$  (dashed horizontal line).

**Figure S3**

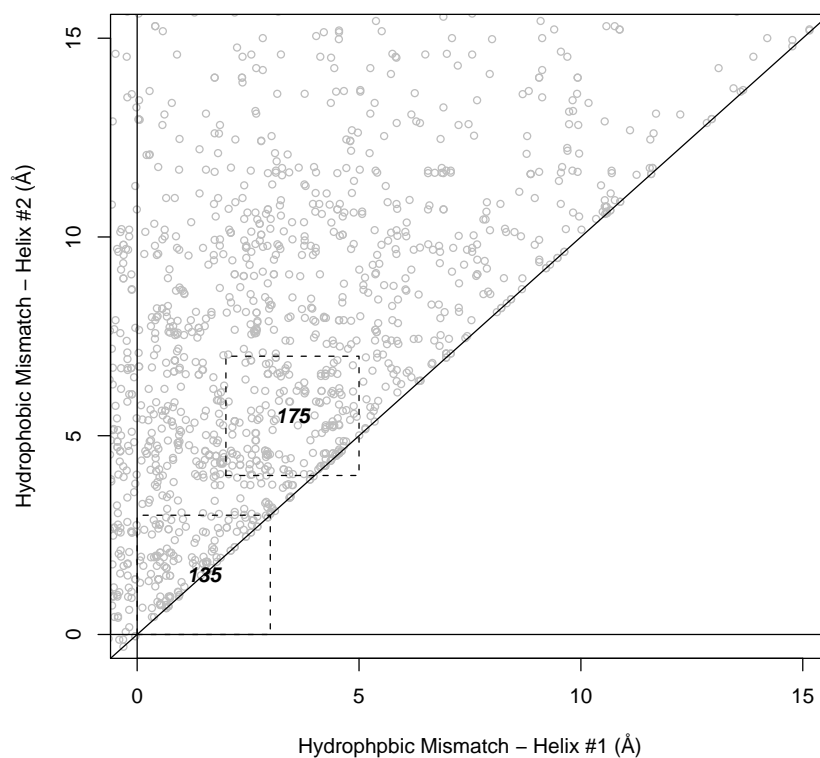

Figure 3: Scatter plot of neighboring helix pairs with positive hydrophobic mismatch as a function of helix hydrophobic mismatch. X-axis represents the hydrophobic mismatch of the helix with the lower mismatch value in the pair. Y-axis represents the hydrophobic mismatch of the helix with the higher mismatch value in the pair. Diagonal line represents pairs with equal mismatch values for both helices. Dashed rectangles correspond to mismatch ranges used in Fig. 5 in the main text. The number on each rectangle represents the number of pairs in that rectangle.

Figure S4

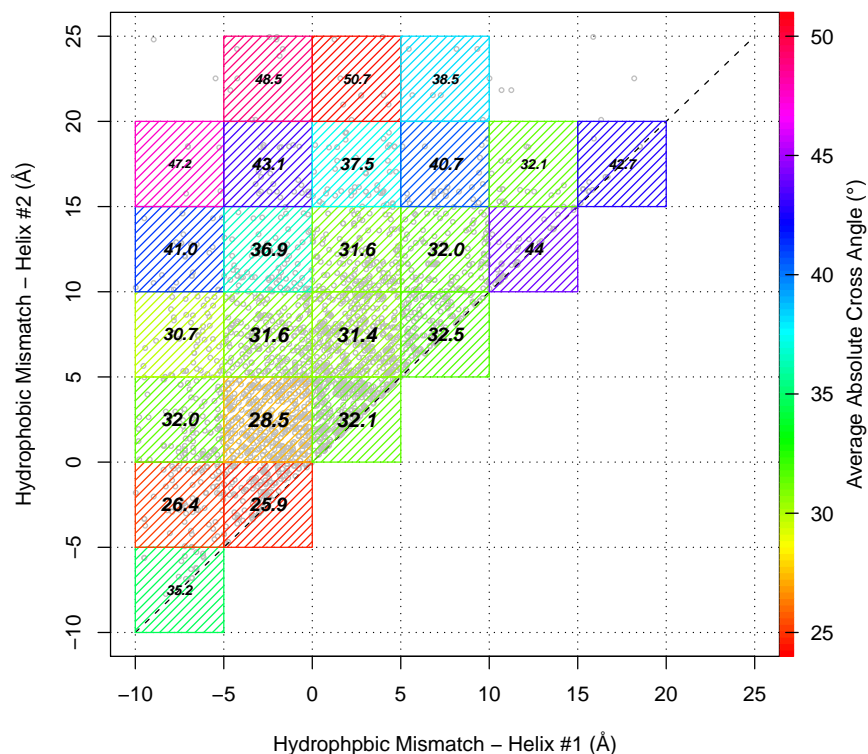

Figure 4: Scatter plot of neighboring helix pairs as function of helix hydrophobic mismatch. Available data points represented by grey circles. Colors and text correspond to average absolute cross angle for pairs in each mismatch range. Text size scales with the number of data points in each range, representing the accuracy in average value calculation. Larger text therefore corresponds to smaller error in average calculation. The plot shows the dependence of cross angle on the hydrophobic mismatch of both helices. We observe smaller cross angle values for helices with small hydrophobic mismatch, and larger cross angle values for helices with large hydrophobic mismatch. We additionally observe larger cross angle values for helices whose mismatch ranges differ (increase in average cross angle towards upper left corner of the plot). Both phenomena are expected from our reference model.

**Figure S5**

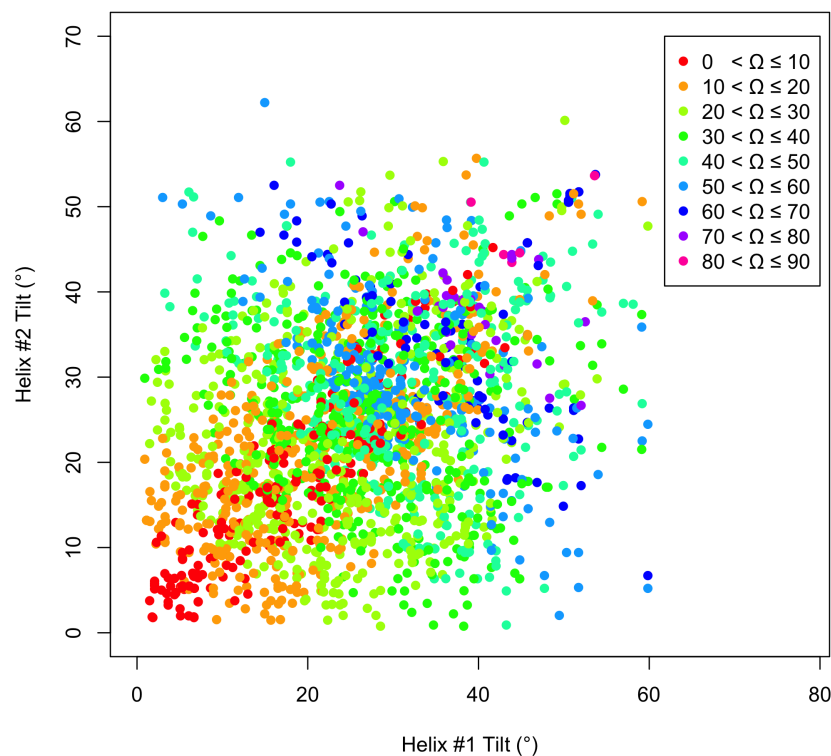

Figure 5: Scatter plot of tilt angles for both helices across all neighboring helix pairs. Colors represent the cross angle of the pair, according to the legend. The plot shows the dependence of cross angle on the tilt angle of both pairs, as expected by Eq. 1 in the main text. Small cross angles ( $\Omega \leq 10$ , red circles) are available only to pairs with a small difference in tilt angles (along the diagonal). While moving away from the diagonal, the cross angles are limited to growingly larger values. The dependence of cross angle value on the sum of tilt angles is also apparent. Each value of cross angles is limited in the bottom left direction of the plot, suggesting a minimal limit on the sum of tilt angles.

**Table S2 - Experimental Structures**

| PDB  | Experimental Method      | Temperature | # Unique Helices | # Neigh. Pairs |
|------|--------------------------|-------------|------------------|----------------|
| 1A11 | SOLUTION NMR             | 313         | 1                | 0              |
| 1A91 | SOLUTION NMR             | 300         | 2                | 1              |
| 1AFO | SOLUTION NMR             | 313         | 1                | 1              |
| 1AR1 | X-RAY DIFFRACTION        | N/A         | 12               | 18             |
| 1DXR | X-RAY DIFFRACTION        | N/A         | 9                | 8              |
| 1E12 | X-RAY DIFFRACTION        | N/A         | 6                | 13             |
| 1EHK | X-RAY DIFFRACTION        | 293         | 13               | 21             |
| 1EYS | X-RAY DIFFRACTION        | 277         | 11               | 15             |
| 1FFT | X-RAY DIFFRACTION        | 277         | 13               | 12             |
| 1FJK | SOLUTION NMR             | 300         | 1                | 0              |
| 1H2S | X-RAY DIFFRACTION        | N/A         | 9                | 18             |
| 1H6I | ELECTRON CRYSTALLOGRAPHY | N/A         | 6                | 15             |
| 1HGZ | FIBER DIFFRACTION        | 300         | 2                | 2              |
| 1IFP | FIBER DIFFRACTION        | 298         | 1                | 1              |
| 1IJD | X-RAY DIFFRACTION        | 291         | 1                | 2              |
| 1J4N | X-RAY DIFFRACTION        | 277         | 6                | 15             |
| 1JB0 | X-RAY DIFFRACTION        | 277         | 26               | 25             |
| 1KF6 | X-RAY DIFFRACTION        | 295         | 6                | 8              |
| 1KPL | X-RAY DIFFRACTION        | 293         | 8                | 11             |
| 1KQF | X-RAY DIFFRACTION        | 277         | 4                | 6              |
| 1L9B | X-RAY DIFFRACTION        | 292         | 11               | 14             |
| 1LDF | X-RAY DIFFRACTION        | 298         | 6                | 19             |
| 1LGH | X-RAY DIFFRACTION        | N/A         | 1                | 2              |
| 1M0L | X-RAY DIFFRACTION        | 295         | 6                | 11             |
| 1M56 | X-RAY DIFFRACTION        | 277         | 21               | 35             |
| 1MHS | ELECTRON CRYSTALLOGRAPHY | 277         | 7                | 6              |
| 1N7L | SOLUTION NMR             | 323         | 1                | 0              |
| 1NEK | X-RAY DIFFRACTION        | 293         | 6                | 7              |
| 1NKZ | X-RAY DIFFRACTION        | 289         | 1                | 3              |
| 1OKC | X-RAY DIFFRACTION        | N/A         | 6                | 7              |
| 1OQW | X-RAY DIFFRACTION        | 293         | 1                | 0              |
| 1OTS | X-RAY DIFFRACTION        | 298         | 8                | 10             |
| 1P49 | X-RAY DIFFRACTION        | 298         | 2                | 1              |
| 1PP9 | X-RAY DIFFRACTION        | 277         | 11               | 18             |
| 1PW4 | X-RAY DIFFRACTION        | 293         | 11               | 18             |
| 1PY6 | X-RAY DIFFRACTION        | 310         | 6                | 7              |
| 1Q90 | X-RAY DIFFRACTION        | 277         | 13               | 25             |
| 1QL1 | FIBER DIFFRACTION        | 283         | 2                | 0              |
| 1R3J | X-RAY DIFFRACTION        | 293         | 2                | 3              |
| 1RC2 | X-RAY DIFFRACTION        | 300         | 6                | 15             |
| 1RKL | SOLUTION NMR             | 298         | 1                | 0              |
| 1RWT | X-RAY DIFFRACTION        | 291         | 3                | 1              |

| PDB  | Experimental Method      | Temperature | # Unique Helices | # Neigh. Pairs |
|------|--------------------------|-------------|------------------|----------------|
| 1S5H | X-RAY DIFFRACTION        | 293         | 2                | 3              |
| 1SU4 | X-RAY DIFFRACTION        | N/A         | 7                | 8              |
| 1T5S | X-RAY DIFFRACTION        | 292         | 8                | 7              |
| 1U7G | X-RAY DIFFRACTION        | 298         | 9                | 28             |
| 1UAZ | X-RAY DIFFRACTION        | 280         | 6                | 7              |
| 1V55 | X-RAY DIFFRACTION        | N/A         | 22               | 47             |
| 1VGO | X-RAY DIFFRACTION        | 283         | 6                | 7              |
| 1WPG | X-RAY DIFFRACTION        | N/A         | 9                | 12             |
| 1WU0 | SOLUTION NMR             | 298         | 2                | 1              |
| 1XIO | X-RAY DIFFRACTION        | 293         | 7                | 12             |
| 1XL6 | X-RAY DIFFRACTION        | 293         | 2                | 5              |
| 1XRD | SOLUTION NMR             | 298         | 1                | 0              |
| 1YCE | X-RAY DIFFRACTION        | 290         | 2                | 7              |
| 1YEW | X-RAY DIFFRACTION        | 298         | 7                | 5              |
| 1YMG | X-RAY DIFFRACTION        | 298         | 6                | 17             |
| 1YQ3 | X-RAY DIFFRACTION        | 278         | 6                | 8              |
| 1ZCD | X-RAY DIFFRACTION        | 279         | 7                | 9              |
| 1ZLL | SOLUTION NMR             | 303         | 1                | 2              |
| 1ZOY | X-RAY DIFFRACTION        | 290         | 5                | 6              |
| 1ZRT | X-RAY DIFFRACTION        | 277         | 10               | 13             |
| 2A0L | X-RAY DIFFRACTION        | 293         | 2                | 3              |
| 2A65 | X-RAY DIFFRACTION        | 291         | 9                | 18             |
| 2A9H | SOLUTION NMR             | 315         | 2                | 3              |
| 2AGV | X-RAY DIFFRACTION        | 283         | 5                | 4              |
| 2B2F | X-RAY DIFFRACTION        | 298         | 9                | 28             |
| 2B5F | X-RAY DIFFRACTION        | N/A         | 5                | 9              |
| 2B6O | ELECTRON CRYSTALLOGRAPHY | 300         | 6                | 17             |
| 2BBJ | X-RAY DIFFRACTION        | 297         | 1                | 0              |
| 2BG9 | ELECTRON MICROSCOPY      | 277.20      | 16               | 28             |
| 2BHW | X-RAY DIFFRACTION        | N/A         | 1                | 0              |
| 2BL2 | X-RAY DIFFRACTION        | N/A         | 4                | 11             |
| 2BS2 | X-RAY DIFFRACTION        | N/A         | 5                | 9              |
| 2BS3 | X-RAY DIFFRACTION        | N/A         | 4                | 6              |
| 2E74 | X-RAY DIFFRACTION        | N/A         | 10               | 20             |
| 2F2B | X-RAY DIFFRACTION        | 295         | 6                | 19             |
| 2FYN | X-RAY DIFFRACTION        | 288.20      | 10               | 15             |
| 2GFP | X-RAY DIFFRACTION        | N/A         | 10               | 15             |
| 2H8A | ELECTRON CRYSTALLOGRAPHY | 277         | 3                | 4              |
| 2HIL | ELECTRON MICROSCOPY      | 368         | 1                | 0              |
| 2HYD | X-RAY DIFFRACTION        | N/A         | 4                | 4              |
| 2IFO | FIBER DIFFRACTION        | 298         | 2                | 0              |
| 2IQL | THEORETICAL MODEL        | 298         | 6                | 9              |
| 2IQO | THEORETICAL MODEL        | 298         | 6                | 9              |
| 2IQR | THEORETICAL MODEL        | 298         | 5                | 6              |

| PDB  | Experimental Method            | Temperature | # Unique Helices | # Neigh. Pairs |
|------|--------------------------------|-------------|------------------|----------------|
| 2IQV | THEORETICAL MODEL              | 298         | 6                | 9              |
| 2JLN | X-RAY DIFFRACTION              | N/A         | 7                | 6              |
| 2JWA | SOLUTION NMR                   | 313         | 2                | 1              |
| 2K1K | SOLUTION NMR                   | 313         | 1                | 1              |
| 2K74 | SOLUTION NMR                   | 313         | 2                | 1              |
| 2K9P | SOLUTION NMR                   | 320         | 2                | 1              |
| 2K9Y | SOLUTION NMR                   | 313         | 1                | 1              |
| 2KA2 | SOLUTION NMR                   | 313         | 1                | 1              |
| 2KB7 | SOLID-STATE NMR - SOLUTION NMR | N/A         | 1                | 0              |
| 2KDC | SOLUTION NMR                   | 318         | 1                | 0              |
| 2KIX | SOLUTION NMR                   | 305         | 1                | 2              |
| 2KNC | SOLUTION NMR                   | 298         | 2                | 1              |
| 2KQT | SOLID-STATE NMR                | 243         | 1                | 2              |
| 2KSD | SOLUTION NMR                   | 318         | 2                | 1              |
| 2KSE | SOLUTION NMR                   | 313         | 2                | 1              |
| 2KSF | SOLUTION NMR                   | 318         | 3                | 2              |
| 2KSR | SOLUTION NMR                   | 313         | 4                | 3              |
| 2KV5 | SOLUTION NMR                   | 303         | 1                | 0              |
| 2KWX | SOLUTION NMR                   | 303         | 1                | 2              |
| 2KYH | SOLUTION NMR                   | 318         | 3                | 2              |
| 2L35 | SOLUTION NMR                   | 303         | 3                | 3              |
| 2L9U | SOLUTION NMR                   | 313         | 1                | 1              |
| 2LAT | SOLUTION NMR                   | 298         | 1                | 0              |
| 2LCK | SOLUTION NMR                   | 306         | 4                | 2              |
| 2NQ2 | X-RAY DIFFRACTION              | 277         | 8                | 12             |
| 2NR9 | X-RAY DIFFRACTION              | 298         | 4                | 4              |
| 2NRF | X-RAY DIFFRACTION              | 295         | 4                | 4              |
| 2NS1 | X-RAY DIFFRACTION              | 293         | 9                | 27             |
| 2NWL | X-RAY DIFFRACTION              | 277         | 5                | 3              |
| 2O01 | X-RAY DIFFRACTION              | 278         | 6                | 0              |
| 2OAR | X-RAY DIFFRACTION              | N/A         | 2                | 5              |
| 2OAU | X-RAY DIFFRACTION              | 277         | 1                | 0              |
| 2Q7R | X-RAY DIFFRACTION              | 298         | 2                | 2              |
| 2QI9 | X-RAY DIFFRACTION              | 293         | 14               | 18             |
| 2QKS | X-RAY DIFFRACTION              | 293         | 2                | 5              |
| 2QTS | X-RAY DIFFRACTION              | 277         | 2                | 4              |
| 2RDD | X-RAY DIFFRACTION              | 293         | 10               | 13             |
| 2RH1 | X-RAY DIFFRACTION              | 293         | 7                | 10             |
| 2RLF | SOLUTION NMR                   | 303.10      | 1                | 2              |
| 2UUH | X-RAY DIFFRACTION              | N/A         | 3                | 8              |
| 2V50 | X-RAY DIFFRACTION              | N/A         | 22               | 41             |
| 2V8N | X-RAY DIFFRACTION              | N/A         | 5                | 2              |
| 2VL0 | X-RAY DIFFRACTION              | N/A         | 2                | 0              |
| 2VPZ | X-RAY DIFFRACTION              | N/A         | 14               | 25             |

| PDB  | Experimental Method                | Temperature | # Unique Helices | # Neigh. Pairs |
|------|------------------------------------|-------------|------------------|----------------|
| 2VT4 | X-RAY DIFFRACTION                  | N/A         | 7                | 11             |
| 2W2E | X-RAY DIFFRACTION                  | N/A         | 5                | 18             |
| 2W5J | X-RAY DIFFRACTION                  | N/A         | 1                | 2              |
| 2WCD | X-RAY DIFFRACTION                  | N/A         | 1                | 2              |
| 2WIT | X-RAY DIFFRACTION                  | N/A         | 12               | 26             |
| 2WLL | X-RAY DIFFRACTION                  | N/A         | 2                | 5              |
| 2WSW | X-RAY DIFFRACTION                  | N/A         | 7                | 8              |
| 2WSX | X-RAY DIFFRACTION                  | N/A         | 10               | 19             |
| 2WWB | ELECTRON MICROSCOPY                | 357         | 7                | 4              |
| 2XKM | SOLID-STATE NMR; X-RAY DIFFRACTION | N/A         | 1                | 0              |
| 2XOK | X-RAY DIFFRACTION                  | N/A         | 2                | 7              |
| 2XQ2 | X-RAY DIFFRACTION                  | N/A         | 11               | 13             |
| 2XQU | X-RAY DIFFRACTION                  | N/A         | 2                | 7              |
| 2XUT | X-RAY DIFFRACTION                  | N/A         | 8                | 9              |
| 2XZB | ELECTRON CRYSTALLOGRAPHY           | 277.50      | 7                | 4              |
| 2YDV | X-RAY DIFFRACTION                  | N/A         | 7                | 12             |
| 2YL4 | X-RAY DIFFRACTION                  | N/A         | 5                | 7              |
| 2YVX | X-RAY DIFFRACTION                  | 293         | 3                | 3              |
| 2YXR | X-RAY DIFFRACTION                  | 277         | 8                | 7              |
| 2ZBD | X-RAY DIFFRACTION                  | 283         | 8                | 12             |
| 2ZJS | X-RAY DIFFRACTION                  | 293         | 6                | 5              |
| 2ZT9 | X-RAY DIFFRACTION                  | N/A         | 11               | 22             |
| 2ZW3 | X-RAY DIFFRACTION                  | 277         | 4                | 9              |
| 2ZXE | X-RAY DIFFRACTION                  | 298         | 6                | 3              |
| 2ZZ9 | ELECTRON CRYSTALLOGRAPHY           | 293         | 6                | 15             |
| 3A0B | X-RAY DIFFRACTION                  | 293         | 24               | 21             |
| 3A7K | X-RAY DIFFRACTION                  | 293         | 6                | 11             |
| 3AM6 | X-RAY DIFFRACTION                  | 293         | 6                | 7              |
| 3AQP | X-RAY DIFFRACTION                  | 293         | 12               | 23             |
| 3AR8 | X-RAY DIFFRACTION                  | 283         | 5                | 4              |
| 3AR9 | X-RAY DIFFRACTION                  | 283         | 7                | 8              |
| 3ARC | X-RAY DIFFRACTION                  | 285         | 27               | 32             |
| 3B4R | X-RAY DIFFRACTION                  | 295         | 4                | 2              |
| 3B60 | X-RAY DIFFRACTION                  | 277         | 5                | 7              |
| 3B8C | X-RAY DIFFRACTION                  | N/A         | 2                | 0              |
| 3B8E | X-RAY DIFFRACTION                  | 292         | 5                | 1              |
| 3B9B | X-RAY DIFFRACTION                  | 292         | 8                | 7              |
| 3B9Y | X-RAY DIFFRACTION                  | 298         | 9                | 22             |
| 3BEH | X-RAY DIFFRACTION                  | 298         | 5                | 9              |
| 3C02 | X-RAY DIFFRACTION                  | 291         | 5                | 14             |
| 3CAP | X-RAY DIFFRACTION                  | 277         | 7                | 13             |
| 3CHX | X-RAY DIFFRACTION                  | 293         | 7                | 3              |
| 3CX5 | X-RAY DIFFRACTION                  | 277         | 10               | 14             |
| 3D31 | X-RAY DIFFRACTION                  | 293.15      | 10               | 16             |

| PDB  | Experimental Method      | Temperature | # Unique Helices | # Neigh. Pairs |
|------|--------------------------|-------------|------------------|----------------|
| 3D9S | X-RAY DIFFRACTION        | 281         | 5                | 11             |
| 3DDL | X-RAY DIFFRACTION        | 295         | 7                | 10             |
| 3DIN | X-RAY DIFFRACTION        | 298         | 10               | 12             |
| 3DWW | ELECTRON CRYSTALLOGRAPHY | 373         | 3                | 4              |
| 3E86 | X-RAY DIFFRACTION        | 293         | 2                | 3              |
| 3EAM | X-RAY DIFFRACTION        | 298         | 3                | 6              |
| 3EML | X-RAY DIFFRACTION        | 293         | 6                | 8              |
| 3F5W | X-RAY DIFFRACTION        | 298         | 2                | 1              |
| 3F7V | X-RAY DIFFRACTION        | 298         | 2                | 3              |
| 3F7Y | X-RAY DIFFRACTION        | 298         | 2                | 1              |
| 3FB5 | X-RAY DIFFRACTION        | 298         | 2                | 3              |
| 3G5U | X-RAY DIFFRACTION        | 278         | 12               | 18             |
| 3GD8 | X-RAY DIFFRACTION        | 298         | 6                | 17             |
| 3GIA | X-RAY DIFFRACTION        | 293         | 8                | 11             |
| 3H1J | X-RAY DIFFRACTION        | 277         | 9                | 9              |
| 3H9V | X-RAY DIFFRACTION        | 277         | 1                | 2              |
| 3HD6 | X-RAY DIFFRACTION        | 277         | 6                | 12             |
| 3HD7 | X-RAY DIFFRACTION        | 293         | 2                | 1              |
| 3HFX | X-RAY DIFFRACTION        | 289         | 7                | 8              |
| 3HQB | X-RAY DIFFRACTION        | 293         | 9                | 19             |
| 3HZQ | X-RAY DIFFRACTION        | 277         | 1                | 2              |
| 3J01 | ELECTRON MICROSCOPY      | N/A         | 6                | 2              |
| 3JYC | X-RAY DIFFRACTION        | 277.10      | 2                | 5              |
| 3K03 | X-RAY DIFFRACTION        | 293         | 2                | 3              |
| 3K3F | X-RAY DIFFRACTION        | 293         | 6                | 11             |
| 3KBC | X-RAY DIFFRACTION        | 277         | 4                | 1              |
| 3KCU | X-RAY DIFFRACTION        | 291         | 6                | 23             |
| 3KG2 | X-RAY DIFFRACTION        | 277         | 3                | 5              |
| 3KLY | X-RAY DIFFRACTION        | 291         | 13               | 48             |
| 3KP9 | X-RAY DIFFRACTION        | 298         | 5                | 6              |
| 3KZI | X-RAY DIFFRACTION        | 291         | 28               | 35             |
| 3L1L | X-RAY DIFFRACTION        | 291.15      | 15               | 18             |
| 3LBW | X-RAY DIFFRACTION        | N/A         | 1                | 2              |
| 3LDC | X-RAY DIFFRACTION        | 293         | 2                | 1              |
| 3LLQ | X-RAY DIFFRACTION        | 295         | 6                | 16             |
| 3LUT | X-RAY DIFFRACTION        | N/A         | 5                | 6              |
| 3M73 | X-RAY DIFFRACTION        | 298         | 9                | 20             |
| 3MK7 | X-RAY DIFFRACTION        | 294         | 10               | 13             |
| 3MKT | X-RAY DIFFRACTION        | 295         | 10               | 11             |
| 3MP7 | X-RAY DIFFRACTION        | 273         | 9                | 11             |
| 3MRA | SOLUTION NMR             | 303         | 1                | 0              |
| 3N23 | X-RAY DIFFRACTION        | 292         | 6                | 3              |
| 3ND0 | X-RAY DIFFRACTION        | 293         | 7                | 9              |
| 3NE2 | X-RAY DIFFRACTION        | N/A         | 6                | 23             |

| PDB  | Experimental Method | Temperature | # Unique Helices | # Neigh. Pairs |
|------|---------------------|-------------|------------------|----------------|
| 3NE5 | X-RAY DIFFRACTION   | 298         | 6                | 6              |
| 3O0R | X-RAY DIFFRACTION   | 277         | 12               | 23             |
| 3O7Q | X-RAY DIFFRACTION   | 291         | 12               | 24             |
| 3OAX | X-RAY DIFFRACTION   | 283         | 7                | 11             |
| 3OB6 | X-RAY DIFFRACTION   | 298         | 8                | 12             |
| 3ODU | X-RAY DIFFRACTION   | 293         | 5                | 6              |
| 3ORG | X-RAY DIFFRACTION   | 298         | 6                | 7              |
| 3OUF | X-RAY DIFFRACTION   | 293         | 2                | 3              |
| 3P03 | X-RAY DIFFRACTION   | 291         | 19               | 32             |
| 3P0G | X-RAY DIFFRACTION   | 293         | 7                | 12             |
| 3P5N | X-RAY DIFFRACTION   | 298         | 4                | 4              |
| 3PBL | X-RAY DIFFRACTION   | 293         | 6                | 9              |
| 3PCQ | X-RAY DIFFRACTION   | 277         | 24               | 23             |
| 3PJZ | X-RAY DIFFRACTION   | 298         | 5                | 2              |
| 3PL9 | X-RAY DIFFRACTION   | 291         | 3                | 1              |
| 3PQR | X-RAY DIFFRACTION   | 277         | 6                | 8              |
| 3PUY | X-RAY DIFFRACTION   | 293         | 11               | 18             |
| 3PUZ | X-RAY DIFFRACTION   | 293         | 10               | 16             |
| 3PXO | X-RAY DIFFRACTION   | 277         | 7                | 13             |
| 3Q7K | X-RAY DIFFRACTION   | 293         | 6                | 23             |
| 3QE7 | X-RAY DIFFRACTION   | 291         | 9                | 11             |
| 3QNQ | X-RAY DIFFRACTION   | 293         | 7                | 14             |
| 3RCE | X-RAY DIFFRACTION   | 298         | 6                | 4              |
| 3RFU | X-RAY DIFFRACTION   | 293         | 5                | 3              |
| 3RHW | X-RAY DIFFRACTION   | 277         | 3                | 4              |
| 3RKO | X-RAY DIFFRACTION   | 296         | 41               | 67             |
| 3RLB | X-RAY DIFFRACTION   | 279         | 4                | 3              |
| 3RVY | X-RAY DIFFRACTION   | 298         | 8                | 16             |
| 3RZE | X-RAY DIFFRACTION   | 293         | 7                | 11             |
| 3S0X | X-RAY DIFFRACTION   | 298         | 4                | 2              |

Table 2: PDB entries of all experimental structures used in the OPM database analysis. Experimental Method and Temperature was obtained for each PDB entry from the RCSB protein data bank (10). In X-ray diffraction experiments the temperature refers to the crystallization temperature. The two right-most columns provide the number of unique helices and the number of neighboring helix pairs extracted for each protein structure by our method.

## Supporting References

1. Kabsch, W., and C. Sander, 1983. Dictionary of protein secondary structure - pattern-recognition of hydrogen-bonded and geometrical features. *Biopolymers* 22:2577–2637.
2. Walters, R. F. S., and W. F. DeGrado, 2006. Helix-packing motifs in membrane proteins. *Proceedings of the National Academy of Sciences of the United States of America* 103:13658–13663.
3. Bansal, M., S. Kumar, and R. Velavan, 2000. HELANAL: A program to characterize helix geometry in proteins. *Journal of Biomolecular Structure & Dynamics* 17:811–819.
4. Michaud-Agrawal, N., E. J. Denning, T. B. Woolf, and O. Beckstein, 2011. Software News and Updates MDAnalysis: A Toolkit for the Analysis of Molecular Dynamics Simulations. *Journal of Computational Chemistry* 32:2319–2327.
5. Gimpelev, M., L. R. Forrest, D. Murray, and B. Honig, 2004. Helical packing patterns in membrane and soluble proteins. *Biophysical Journal* 87:4075–4086.
6. Chothia, C., M. Levitt, and D. Richardson, 1981. Helix to helix packing in proteins. *Journal of Molecular Biology* 145:215–250.
7. Li, A. J., and R. Nussinov, 1998. A set of van der Waals and Coulombic radii of protein atoms for molecular and solvent-accessible surface calculation, packing evaluation, and docking. *Proteins-Structure Function and Genetics* 32:111–127.
8. de Meyer, F. J. M., J. M. Rodgers, T. F. Willems, and B. Smit, 2010. Molecular Simulation of the Effect of Cholesterol on Lipid-Mediated Protein-Protein Interactions. *Biophysical Journal* 99:3629–3638.
9. Kucerka, N., J. F. Nagle, J. N. Sachs, S. E. Feller, J. Pencer, A. Jackson, and J. Katsaras, 2008. Lipid bilayer structure determined by the simultaneous analysis of neutron and x-ray scattering data. *Biophysical Journal* 95:2356–2367.
10. Research Collaboratory for Structural Bioinformatics (RCSB) Protein Data Bank. <http://www.rcsb.org>.
